# Supplementary material for: Dynamin and reverse-mode sodium calcium exchanger blockade confers neuroprotection from diffuse axonal injury
Source: PubMed Central journal article supplement (PMC6765020; doi:10.1038/s41419-019-1908-3), 2019-09-27
Supplement: 41419_2019_1908_MOESM2_ESM.pdf [file 41419_2019_1908_MOESM2_ESM.pdf]

## Supplementary Figure S2

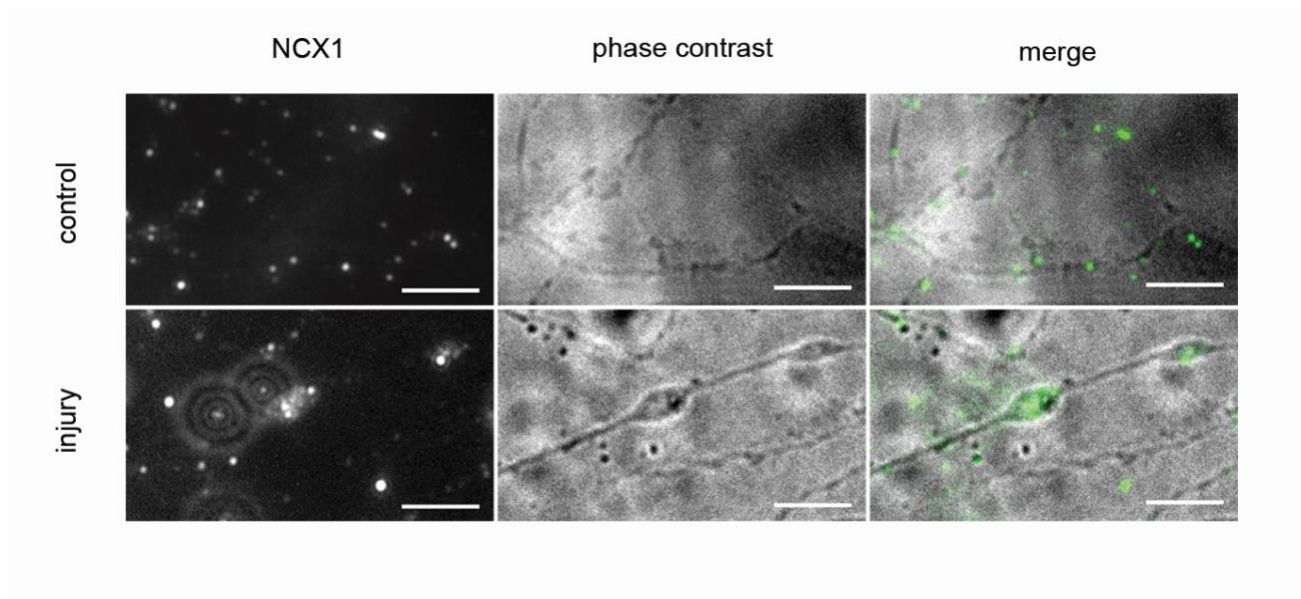

**Supplementary Fig. S2** NCX1 immunostaining in control and injury conditions. Axons protruding from hippocampal organotypic slices cultured in microfluidic devices were injured with application of 15% stretch and fixed 5min post-injury. Representative fluorescence micrographs showing NCX1 immunostaining in axonal processes in control and injury conditions. Results obtained from three microfluidic device cultures per condition (separate donor animals used for each device),  $n = 3$ . Scale bars, 20 $\mu$ m.
